# Supplementary material for: A Reliable and Fast Two-Step Solid-Phase Extraction Methodology for the Obtention of Anthocyanin-Rich Extracts from Different Sources
Source: Preprints.org preprint supplement (doi:10.20944/preprints202407.1379.v1), 2024-07-17
Supplement: Supplementary file 1 [file supplementary]

Article Supplementary Information

# A reliable and fast two-step solid-phase extraction methodology for the obtention of anthocyanin-rich extracts from different sources

Wen Tao<sup>1</sup>, Lorenzo De Luca<sup>1,2</sup>, Nuno Mateus<sup>1</sup>, Victor de Freitas<sup>1</sup>, Matteo Bordiga<sup>\*2</sup> and Hélder Oliveira<sup>\*1</sup>

<sup>1</sup> REQUIMTE/LAQV, Chemistry and Biochemistry Department, Faculty of Sciences, University of Porto, Portugal;

<sup>2</sup> Department of Pharmaceutical Sciences, Università del Piemonte Orientale, Largo Donegani 2, 28100 Novara, Italy

<sup>1</sup> both authors contributed equally

\* Correspondence: matteo.bordiga@uniupo.it; helder.oliveira@fc.up.pt

**Table S1.** LC-MS identification of main polyphenols (non-anthocyanins) in the different full extracts on negative mode. N.D. stands for “not determined”.

| Extract                 | R <sub>t</sub> (min) | [M-H]<br>(m/z) | Main fragment ions                    | λ <sub>max</sub> (nm) | Tentative identification                              |
|-------------------------|----------------------|----------------|---------------------------------------|-----------------------|-------------------------------------------------------|
| cornflower              | 8.19                 | 627.18         | 465.18, 303.19                        | 276, 332              | Taxifolin-O-dihexoside                                |
|                         | 9.38                 | 191.1          | 126.92                                | 292, 312              | Quinic acid isomer 1                                  |
|                         | 10.12                | 727.32         | 627.19, 465.25, 447.29, 285.15        | 280, 324              | Kaempferol derivative                                 |
|                         | 11.3                 | 191.08         | 126.91                                | 280, 312              | Quinic acid isomer 2                                  |
|                         | 12.8                 | 607.27         | 445.19, 431.21, 269                   | 268, 320              | Apigenin-O-hexoside-O-glucuronide isomer 1            |
|                         | 13.07                | 607.22         | 445.14, 431.19, 269.11                | 276, 308              | Apigenin-O-hexoside-O-glucuronide isomer 2            |
|                         | 18.34                | 693.23         | 649.23, 473.19, 445.35, 269.2         | 268, 320              | Apigenin-O-glucuronide-O-(malonylhexoside)            |
|                         | 22.94                | 445.15         | 269.04                                | 268, 336              | Apigenin-O-glucuronide                                |
| wild pansy              | 9.74                 | 609.33         | 301.35                                | 288, 334              | Quercetin-3-O-rutinoside isomer 1                     |
|                         | 10.69                | 593.28         | 285.17                                | 288, 334              | Kaempferol-3-O-rutinoside                             |
|                         | 10.87                | 627.28         | 465.38                                | 288, 334              | Taxifolin-O-dihexoside                                |
|                         | 13.06                | 625.32         | 317.09                                | 265, 352              | Myricetin-3-O-rutinoside                              |
|                         | 13.45                | 755.45         | 609.28                                | 252, 353              | Quercetin-3-O-(6-O-rhamnosylglucoside)-7-O-rhamnoside |
|                         | 14.23                | 785.45         | 639.30, 315.04                        | 268, 300              | Isorhamnetin-3-(2-rhamnosyl)-O-diglucoside            |
|                         | 16.26                | 609.36         | 301                                   | 264, 348              | Quercetin-3-O-rutinoside isomer 2                     |
|                         | 17                   | 769.44         | 623.27, 605.3, 503.37, 357.13, 315.14 | 269, 336              | Isorhamnetin-3-O-(2,6-di-O-rhamnosyl-glucoside)       |
| butterfly pea<br>flower | 10.57                | 722.62         | 641.48, 560.40                        | 288, 356, 376         | N. D                                                  |
|                         | 13.36                | 755.37         | 609.29, 301.13                        | 267, 356              | Quercetin-3-O-(6-O-rhamnosylglucoside)-7-O-rhamnoside |
|                         | 14.73                | 609.29         |                                       | 266, 356              | Quercetin-3-O-rutinoside                              |
|                         | 15.22                | 898.57         | 876.41, 795.39                        | 288, 376              | N. D                                                  |
|                         | 15.59                | 739.4          | 593.24, 285.17                        | 264, 348              | Kaempferol 3-(2G-rhamnosylrutinoside)                 |

|              |       |         |                                |               |                                                                |
|--------------|-------|---------|--------------------------------|---------------|----------------------------------------------------------------|
|              | 17.39 | 593.38  |                                | 300, 356      | Kaempferol 3-neohesperidoside                                  |
|              | 22.15 | 795.57  | 714.55, 612.49,                | 292, 380      | N. D                                                           |
|              | 23.02 | 971.62  | 949.41, 868.33, 714.44         | 292, 376      | N. D                                                           |
|              | 25.13 | 714.57  | 612.49, 397.17                 | 296, 380      | N. D                                                           |
|              | 31.33 | 868.58  | 766.54, 685.5, 612.48, 307.21  | 292, 356      | N. D                                                           |
|              | 7.95  | 789.38  | 627.26, 447.33, 285.03         | 280, 376      | Kaempferol derivative                                          |
|              | 8.88  | 1097.66 | 935.29, 773.38, 663.32, 447.24 | 280, 304      | Kaempferol-3-(hydroxycoumaroyl)-O-sophoroside-7-O- sophoroside |
|              | 9.53  | 1155.43 | 993.35, 787.39, 607.09, 463.39 | 296, 324      | N. D                                                           |
| purple       | 12.28 | 935.41  | 773.3, 447.32, 285.02          | 286, 312      | Kaempferol-3-(hydroxycoumaroyl)-sophoroside-7-glucoside        |
| cabbage      | 13.09 | 965.34  | 803.3, 447.2, 285.09           | 281, 324      | Kaempferol-3-(hydroxyferuloyl)-O-sophoroside-7-O-glucoside     |
|              | 13.33 | 995.39  | 833.28, 447.35, 285.01         | 278, 328      | Kaempferol-3-(hydroxysinapoyl)-O-sophoroside-7-O-glucoside     |
|              | 15.1  | 833.43  | 671.34, 447.21, 285.17         | 288, 320      | Kaempferol derivative                                          |
|              | 19.46 | 947.40  |                                | 284, 324      | Kaempferol-3-feruloyldigluconide-7-glucoside                   |
|              | 6.97  | 197.11  | 178.9, 135.03, 122.99, 72.84   | 280, 320      | Salvianic acid A                                               |
|              | 7.21  | 359.24  | 196.94, 179.05                 | 279, 292      | Rosmarinic acid                                                |
|              | 7.39  | 428.37  | 345.12, 248.02, 164.94         | 296, 380      | N. D                                                           |
|              | 7.65  | 433.39  |                                | 288           | Naringenin-O-hexoside                                          |
|              | 7.84  | 437.36  | 275.06, 164.93                 | 276, 306      | N. D                                                           |
|              | 8.2   | 311.13  | 178.91, 149.01, 135.48         | 328           | Caftaric acid                                                  |
|              | 8.55  | 197.02  | 179.04                         | 280, 326      | Salvianic acid A                                               |
|              | 8.99  | 521.32  | 341.16, 197.06                 | 280, 322      | N. D                                                           |
| purple basil | 9.22  | 465.22  | 303.13, 285.15, 124.91         | 284, 328      | Taxifolin-O-hexoside                                           |
|              | 9.63  | 935.42  | 773.27, 447.26, 285.08         | 280, 312, 376 | Kaempferol-3-(hydroxycoumaroyl)-sophoroside-7-glucoside        |
|              | 10.01 | 465.3   | 303.15, 285.13, 124.88         | 295, 320      | Taxifolin-O-hexoside                                           |
|              | 10.3  | 711.28  |                                | 268, 296      | Quercetin-malonyl-glucoside                                    |
|              | 10.56 | 193.04  |                                | 298, 324      | Ferulic acid                                                   |
|              | 13.03 | 951.29  | 789.24, 481.19, 345.20, 315.07 | 296, 306      | Isorhamnetin derivative                                        |
|              | 14.47 | 595.35  | 445.18, 300.07                 | 276, 380      | N. D                                                           |
|              | 16.11 | 597.38  | 311.15, 267.07                 | 296, 328, 380 | N. D                                                           |
|              | 22.07 | 717.47  | 519.28, 339.24                 | 288, 332      | Salvianolic acid E                                             |
|              | 23.23 | 359.27  | 197.03, 179.02                 | 288, 328      | Rosmarinic acid                                                |
|              | 6.62  | 311.19  |                                | 258, 301, 368 | Caftaric acid                                                  |
|              | 7.38  | 164.04  | 146.91, 102.92                 | 296           | N. D                                                           |
|              | 7.68  | 341.25  | 178.97, 161.04                 | 296           | Caffeic acid 3-glucoside                                       |
|              | 8.22  | 311.1   | 179.04, 149.02, 135.04         | 328           | Caftaric acid                                                  |
| purple sweet | 8.94  | 521.39  | 341.19, 197.06                 | 268, 289      | N. D                                                           |
| potato       | 9.24  | 465.25  | 303.04                         | 288, 322      | Taxifolin-O-hexoside                                           |
|              | 10.06 | 305.13  | 225.04                         | 300, 320, 380 | Gallocatechin                                                  |
|              | 12.48 | 917.32  | 755.26, 593.25, 447.27, 285.14 | 296, 320      | Kaempferol-3-O-rutinoside-7-O-sophoroside                      |
|              | 13.09 | 951.37  | 481.13, 345.23, 315.08         | 304, 376      | Isorhamnetin derivative                                        |
|              | 16.19 | 609.34  | 301.06                         | 297, 332      | Quercetin-3-O-rutinoside                                       |
|              | 23.43 | 359.18  | 197.03, 179.01                 | 290, 328      | Rosmarinic acid                                                |

**Table S2.** Cumulative amount of anthocyanins after 40 BV of water applied in each resin. The results are present %  $\pm$  SD of the TAC determined for the full extracts (n=3-8).

| Resin               | Cumulative amount of anthocyanins (%) |                 |                  |                 |                 |                  |
|---------------------|---------------------------------------|-----------------|------------------|-----------------|-----------------|------------------|
|                     | CF <sup>1</sup>                       | WP <sup>1</sup> | BPF <sup>1</sup> | PC <sup>1</sup> | PB <sup>1</sup> | PSP <sup>1</sup> |
| C18 Silica          | 2.7 $\pm$ 0.5                         | 3.3 $\pm$ 1.0   | 1.3 $\pm$ 0.2    | 5.1 $\pm$ 2.1   | 2.3 $\pm$ 0.8   | 5.7 $\pm$ 2.1    |
| Amberlite® XAD 7-HP | 45.4 $\pm$ 2.2                        | 46.6 $\pm$ 4.7  | 64.7 $\pm$ 5.8   | 55.5 $\pm$ 8.7  | 52.6 $\pm$ 1.9  | 49.6 $\pm$ 6.0   |
| Toyopearl® HW-65S   | 2.2 $\pm$ 0.2                         | 2.6 $\pm$ 0.4   | 2.1 $\pm$ 0.3    | 1.8 $\pm$ 0.9   | 1.7 $\pm$ 0.7   | 2.2 $\pm$ 0.4    |
| Sephadex® LH-20     | 29.3 $\pm$ 2.8                        | 45.1 $\pm$ 2.2  | 45.3 $\pm$ 3.2   | 42.9 $\pm$ 5.2  | 43.6 $\pm$ 2.5  | 31.2 $\pm$ 5.4   |
| Oasis® HLB          | 1.6 $\pm$ 0.7                         | 1.5 $\pm$ 0.3   | 1.3 $\pm$ 0.2    | 2.3 $\pm$ 0.2   | 2.2 $\pm$ 1.0   | 1.3 $\pm$ 0.1    |

<sup>1</sup> CF – cornflower; WP – wild pansy; BPF – butterfly pea flower; PC – purple cabbage; PB – purple basil; PSP – purple sweet potato;

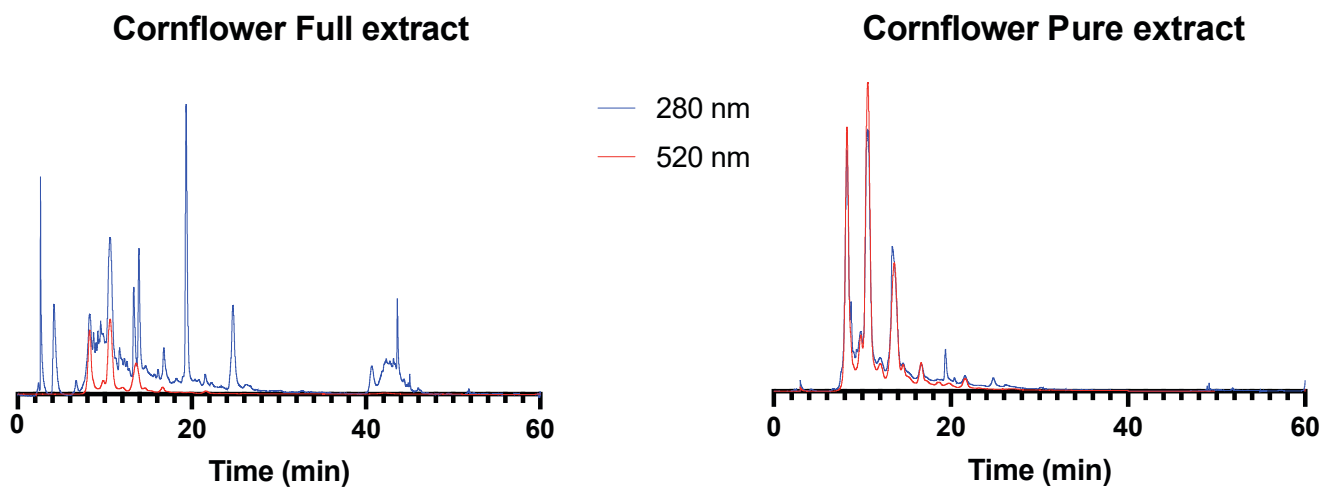

**Figure S1.** a) Purity of the cornflower anthocyanin extracts (full and after the application of the two-step purification) by superimposing the chromatograms obtained by UHPLC-PDA at 280 nm and 520 nm.

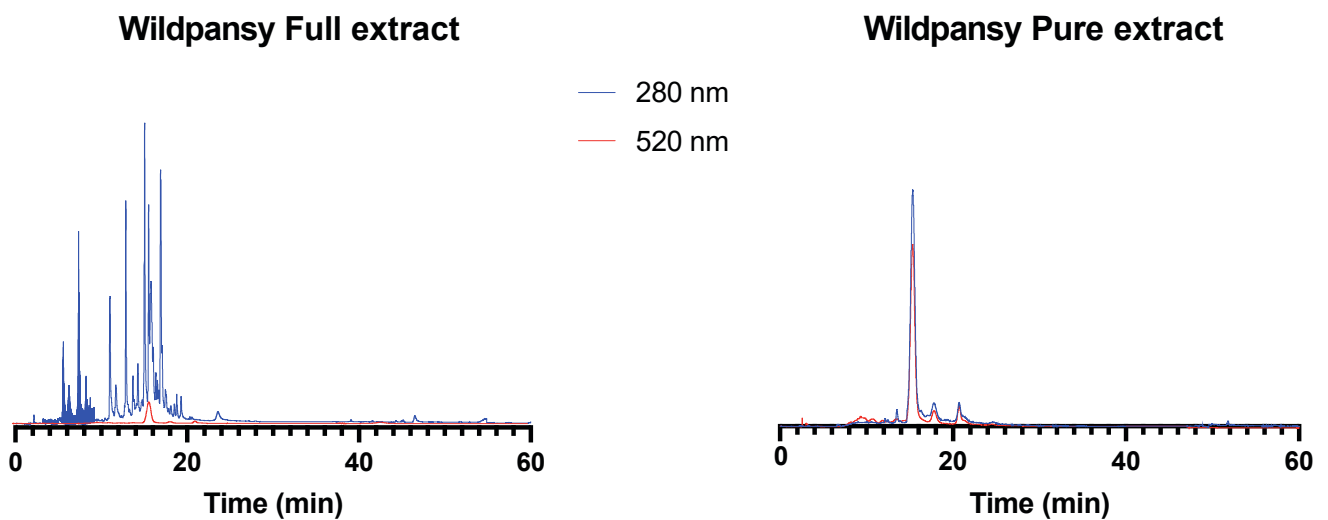

**Figure S2.** a) Purity of the wild pansy anthocyanin extracts (full and after the application of the two-step purification) by superimposing the chromatograms obtained by UHPLC-PDA at 280 nm and 520 nm.

### Butterfly pea flower Full extract

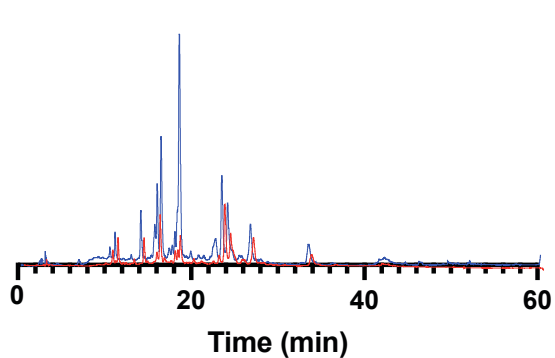

### Butterfly Pea flower extract Pure

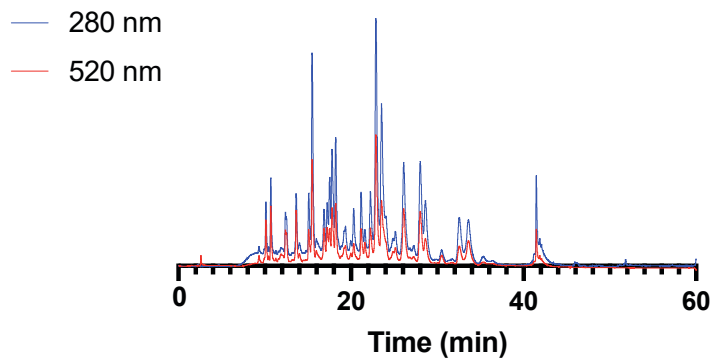

**Figure S3.** a) Purity of the butterfly pea flower anthocyanin extracts (full and after the application of the two-step purification) by superimposing the chromatograms obtained by UHPLC-PDA at 280 nm and 520 nm.

### Purple Cabbage Full extract

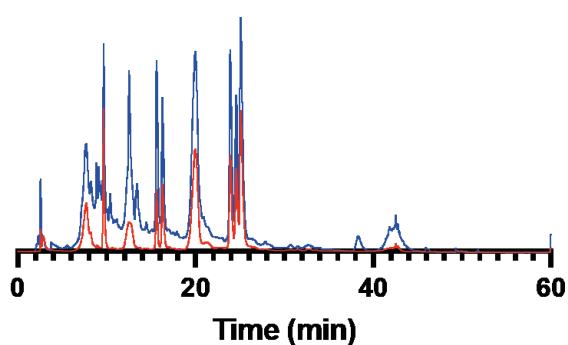

### Purple Cabbage Pure extract

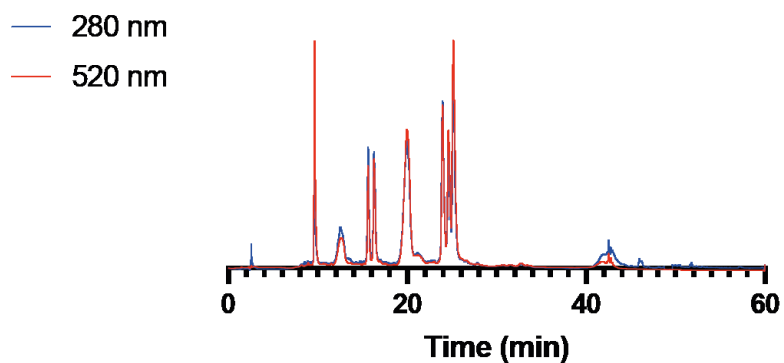

**Figure S4.** a) Purity of the purple cabbage anthocyanin extracts (full and after the application of the two-step purification) by superimposing the chromatograms obtained by UHPLC-PDA at 280 nm and 520 nm.

### Purple Basil Full extract

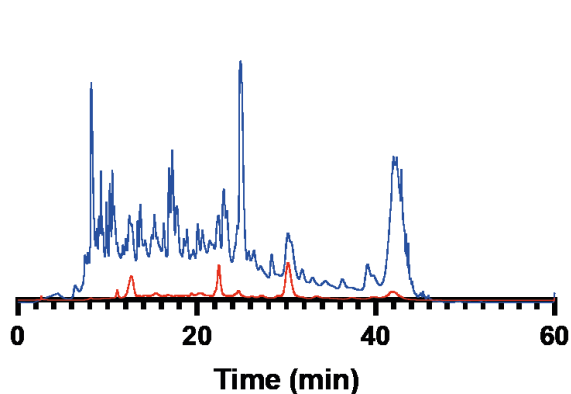

### Purple Basil Pure extract

— 280 nm  
— 520 nm

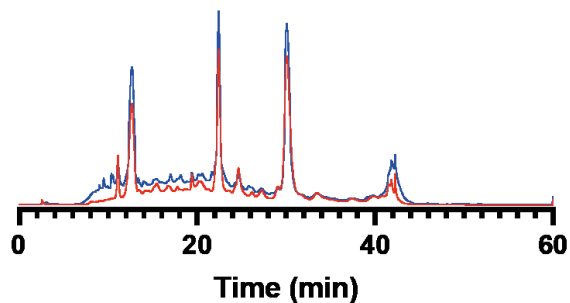

**Figure S5.** a) Purity of the purple basil anthocyanin extracts (full and after the application of the two-step purification) by superimposing the chromatograms obtained by UHPLC-PDA at 280 nm and 520 nm.

### Purple Sweet Potato Full extract

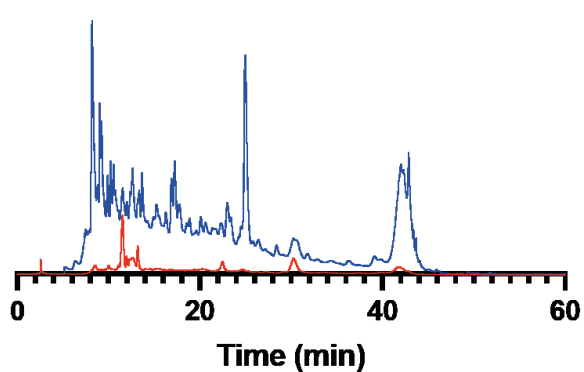

### Purple Sweet Potato Pure extract

— 280 nm  
— 520 nm

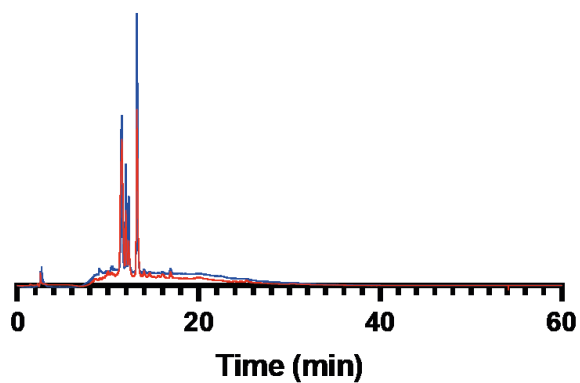

**Figure S6.** a) Purity of the purple sweet potato anthocyanin extracts (full and after the application of the two-step purification) by superimposing the chromatograms obtained by UHPLC-PDA at 280 nm and 520 nm.
